# Supplementary material for: Fluorescent and photochromic bifunctional molecular switch based on a stable crystalline metal-viologen complex
Source: Royal Society of Chemistry journal article supplement (doi:10.1039/c2cc35115c), 2012-01-01
Supplement: c2cc35115c.pdf [file c2cc35115c.pdf]

## Supporting Information

### Fluorescent and photochromic bifunctional molecular switch based on a stable crystalline metal-viologen complex

Yu Zeng, Shijun Liao, Jingcao Dai and Zhiyong Fu\*

#### Experimental Section

**General:** All the reagents were purchased from commercial channels and used without further purification; N-(3-carboxyphenyl)-4,4'-bipyridinium chloride was synthesized as reported.<sup>S1</sup> A TA Instrument Q600 SDT thermogravimetric analyzer was used to obtain the TGA curve in N<sub>2</sub> at a rate of 10 °C min<sup>-1</sup>. The X-ray powder diffraction (XRD) data were collected with a Bruker D8 Advance X-ray diffractometer using CuK $\alpha$  radiation ( $\lambda$  = 1.5406 Å). UV-Visible spectral measurements were carried out using a HITACHI U-3010 spectrometer. The emission/excitation spectra were recorded on a HITACHI F-4500 fluorescence spectrophotometer. IR spectra were characterized by a Bruker Tensor 27 FTIR spectrometer in the range of 4000-400 cm<sup>-1</sup> using a KBr disk. The C, H and N microanalyses were carried out with a Vario EL III elemental analyzer.

Synthesis of [Zn(CPBPY)(HBTC)]·H<sub>2</sub>O **1**: Zn(NO<sub>3</sub>)<sub>2</sub>·6H<sub>2</sub>O (59.4mg, 0.2mmol) was added to a mixture of N-(3-carboxyphenyl)-4,4'-bipyridinium chloride (31.2 mg, 0.1mmol), and 1, 3, 5-H<sub>3</sub>BTC (42.0mg, 0.2mmol) in DMF (5ml), C<sub>2</sub>H<sub>5</sub>OH (3ml) and H<sub>2</sub>O (2ml). The mixture was sealed in a 25ml Teflon-lined steel bomb and heated at 100°C for 48h. Yellow block-like crystals were collected by filtration, washed by water, and dried at room temperature (0.054mmol, 30.6mg, 54% yield based on N-(3-carboxyphenyl)-4,4'-bipyridinium chloride). Elemental Anal. Calc. (%) for C<sub>26</sub>H<sub>18</sub>N<sub>2</sub>O<sub>9</sub>Zn (567.79): C, 55.00; H, 3.20; N, 4.93. Found: C, 54.55; H, 3.27; N, 4.89.

References:

S1 D. Bongard, M. Möller, S. N. Rao, D. Corr and L. Walder, *Helv. Chim. Acta*, 2005, **88**, 3200.

‡Crystal data for **1**: C<sub>26</sub>H<sub>18</sub>N<sub>2</sub>O<sub>9</sub>Zn, fw = 567.79 g · mol<sup>-1</sup>, Monoclinic, space group P2<sub>1</sub>/c, a= 9.5601(19) Å, b= 14.382(3) Å, c= 18.401(5) Å, α = 90°, β = 113.56(2)°, γ = 90°, V = 2318.6(9) Å<sup>3</sup>, Z = 4, ρ<sub>calcd</sub> = 1.627 g · cm<sup>-3</sup>, final R1 = 0.0461 and wR2 = 0.1322 for 3245 independent reflections [I > 2σ(I)]. The data were measured on a Rigaku R-Axis SPIDER CCD diffractometer with MoKα radiation (λ = 0.71073 Å) at 298K. The structure was solved by direct methods and refined by full-matrix leastsquares methods with SHELXL. CCDC 891455 contains the supplementary crystallographic data for this paper. These data can be obtained free of charge from the Cambridge Crystallographic Data Centre via [www.ccdc.cam.ac.uk/data\\_request/cif](http://www.ccdc.cam.ac.uk/data_request/cif).

#### The calculation of kinetic rate constants:

After irradiation UV-Vis and fluorescent spectra are recorded and the calculations of kinetics of light reversion and fluorescence quenching based on the intensity values of the wavelength at 612 nm (UV-Vis spectra) and 500 nm (fluorescent spectra) respectively. The kinetic rate constants are determined by the literature calculation method.<sup>S2</sup> The following equation is used for data treatment:

$$\ln \frac{A_{\infty} - A_0}{A_{\infty} - A_t} = kt$$

where A<sub>0</sub>, A<sub>t</sub>, A<sub>∞</sub> are the observed absorption data (612 nm)/ fluorescent emission (500 nm) at the beginning, versus time, and at the end of the reaction, respectively

S2 T. Kawato, H. Koyama, H. Kanatomi and M. Isshiki, *J. Photochem.*, 1985, **28**, 103.

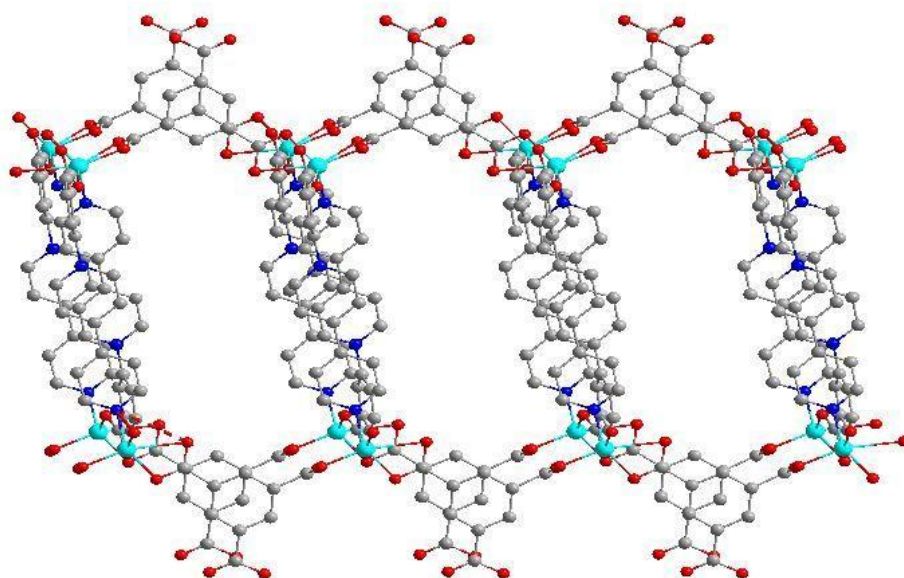

**Fig. S1** Views of the 2D layer structure.

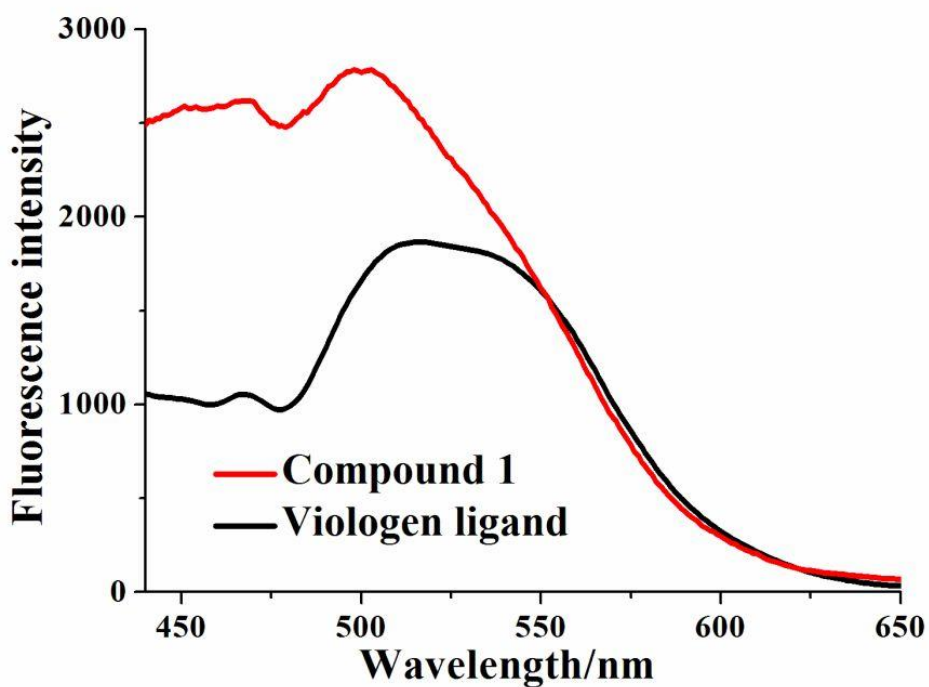

**Fig. S2** Fluorescent spectra of compound **1** and the N-(3-carboxyphenyl)-4,4'-bipyridinium (CPBPY) ligand,  $\lambda_{\text{EX}} = 365$  nm.

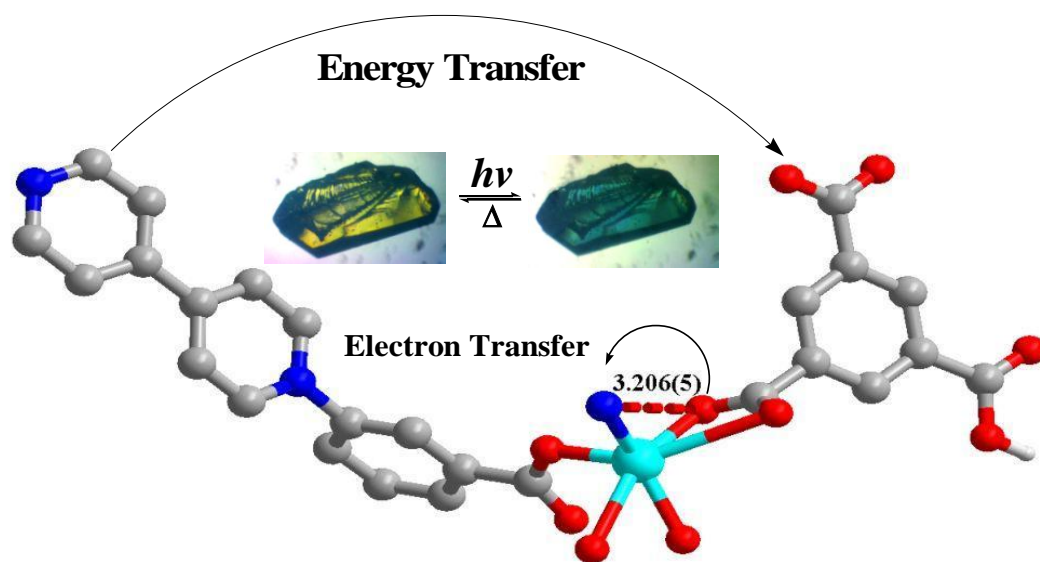

**Fig. S3** The proposed photo-responsive mechanism.

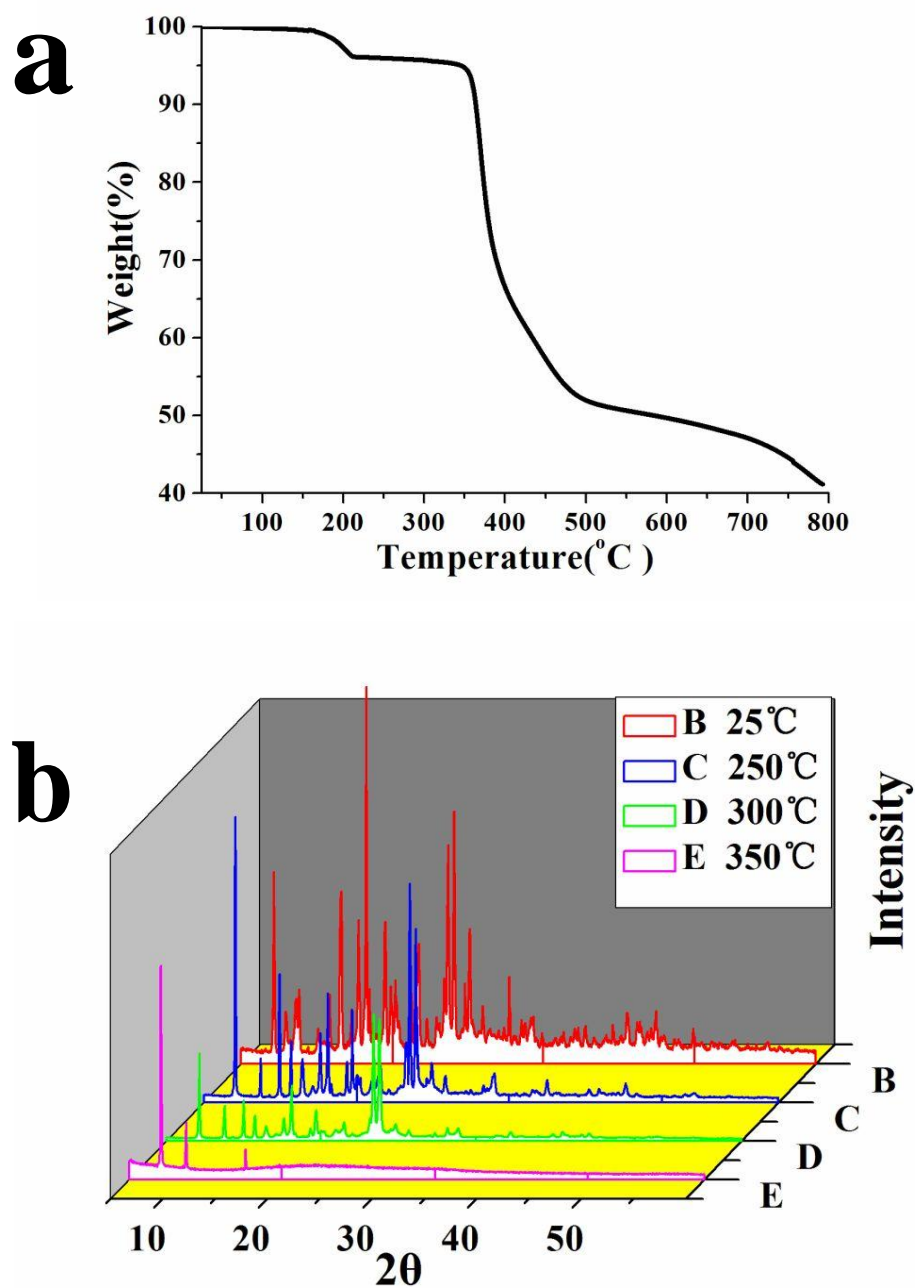

**Fig. S4** (a) Thermal gravimetric curve of compound **1**; (b) Powder XRD patterns calcined at different temperatures.

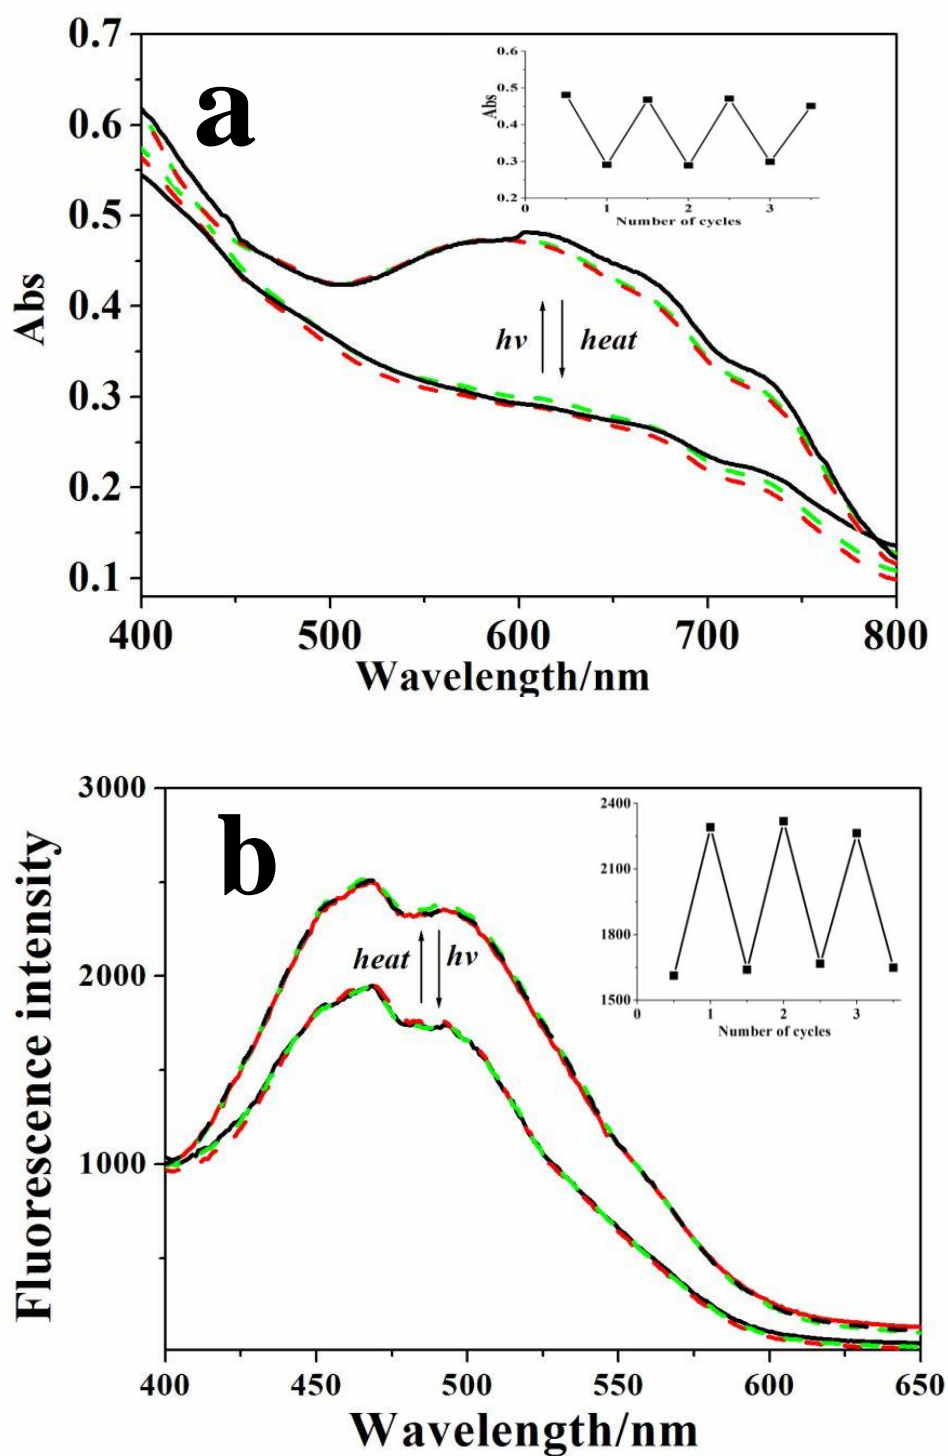

**Fig. S5** (a) UV-Vis absorbance changes at 612 nm and (b) fluorescent emission changes at 500 nm for the sample of **1** on alternate excitation by photoirradiation at 365nm and heated at 170°C over three cycles in air.

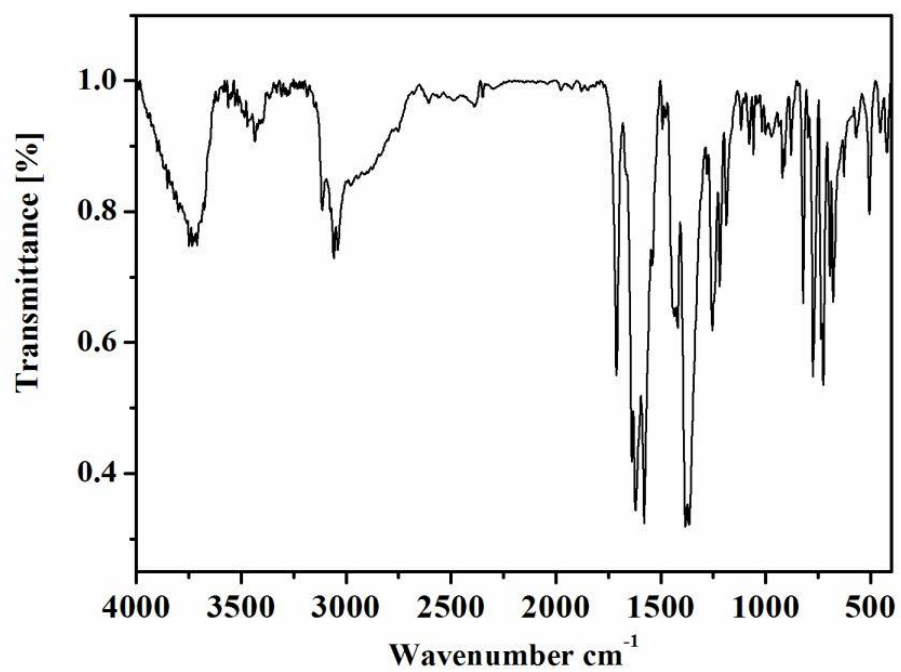

**Fig. S6.** IR spectrum of **1**

15kHz, 2.5mm sample., 297.7K

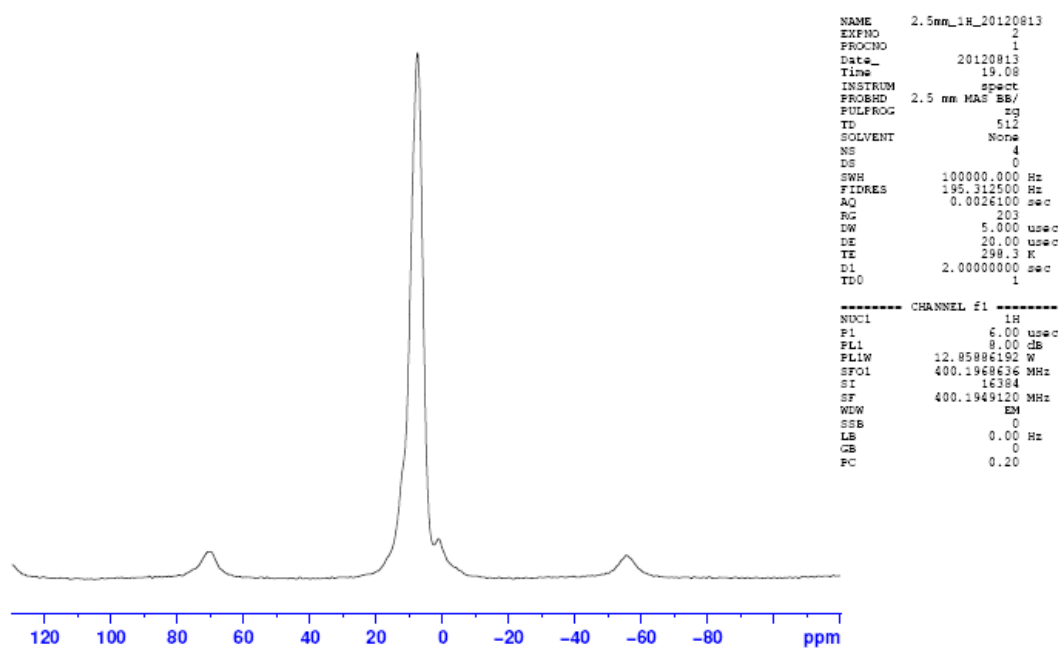

**Fig. S7.** Solid state  $^1\text{H}$ NMR spectrum of **1**
